# Supplementary material
Source: Research Square preprint supplement (doi:10.21203/rs.3.rs-9622872/v1)
Supplement: Supplementary file 1 [file 2d35cbc4f6e9468f0468ec3d.docx]

**Appendix A**

**Research Instruments for the Study on Humanistic Perspectives on Language Assessment**

This appendix presents the qualitative instruments used to explore the relationship between humanistic assessment, institutional accountability, technological innovation, and learner well-being in EFL contexts in Egypt and Saudi Arabia. The instruments are designed to elicit reflective, experience-based responses from instructors, policy makers, and undergraduate students.

**Instrument 1. Semi-Structured Interview Protocol**

**Target group:** EFL instructors and policy makers, including heads of departments and quality assurance coordinators

**Focus:** The tension between institutional standards and humanistic praxis

| **Administration note:** The interviewer may use follow-up prompts to clarify responses, request examples, and invite participants to elaborate on institutional or classroom experiences. Questions should be asked flexibly, while maintaining the core thematic sequence below. |
| --- |

**A. Introduction and Warm-up**

| **No.** | **Interview Question** |
| --- | --- |
| 1 | Can you describe your current role and explain how assessment fits into your daily teaching or administrative responsibilities? |
| 2 | How do you define success in an EFL context? Is success primarily reflected in a high test score, or does it include broader developmental, communicative, and affective outcomes? |

**B. Humanistic Praxis and Systemic Accountability**

| **No.** | **Interview Question** |
| --- | --- |
| 3 | Many institutions in Egypt and Saudi Arabia operate within rigid standardized testing regimes. How do you balance these high-stakes requirements with the personal, emotional, and developmental needs of your students? |
| 4 | To what extent do you feel that you have professional agency to innovate in your assessment practices? Do you feel free to adapt assessment methods, or constrained by institutional compliance requirements? |

**C. Innovation and Generative AI**

| **No.** | **Interview Question** |
| --- | --- |
| 5 | With the rise of tools such as ChatGPT, how has your understanding of fairness in writing assessment changed? |
| 6 | In what ways do you believe AI-enabled tools may humanize assessment through personalization, feedback, or access? In what ways might they dehumanize assessment through automation, surveillance, or reduced teacher judgment? |

**D. Closing Reflection**

| **No.** | **Interview Question** |
| --- | --- |
| 7 | If you could redesign assessment policy in your university to make it more human-centered, what is the first change you would make, and why? |

**Instrument 2. Focus Group Discussion Guide**

**Target group:** Undergraduate students at Beni-Suef University and selected Saudi universities

**Focus:** Learner agency, self-efficacy, technology use, assessment pressure, and well-being

| **Administration note:** The facilitator should encourage respectful discussion, ensure that all participants have the opportunity to speak, and remind students that there are no right or wrong answers. Follow-up prompts may be used to explore shared or contrasting experiences. |
| --- |

| **No.** | **Discussion Area** | **Guiding Question** |
| --- | --- | --- |
| 1 | The Pressure of Standards | How do you feel when preparing for your final English examinations? Do you feel that these examinations truly reflect who you are as a language learner? |
| 2 | Technology and GenAI | When you use tools such as ChatGPT or machine translation for assignments, do you feel more in control of your learning, or do you feel that such tools may reduce your effort or independence? |
| 3 | Automated Assessment and Trust | How do you feel when a teacher uses an automated system or AI tool to grade your work? Do you trust the machine as much as you trust your teacher? Why or why not? |
| 4 | Agency and Feedback | Does the feedback you receive from assessments help you grow as a learner and as a person, or is it mainly experienced as a grade that causes stress? |
| 5 | Ethical Fairness | In your opinion, what makes an English test fair in the digital age? |

**Instrument 3. Qualitative Open-Ended Questionnaire**

**Target group:** All participants

**Format:** Digital survey administered through Microsoft Forms or Google Forms

**Focus:** Participant definitions and interpretations of humanistic accountability

| **Administration note:** Participants should provide brief, reflective answers. Responses may be written in English or Arabic, depending on participant preference and institutional arrangements. |
| --- |

| **No.** | **Item** | **Question** | **Response Format** |
| --- | --- | --- | --- |
| 1 | Defining Accountability | In one sentence, what does being accountable mean to you as a teacher, student, or policy maker? | Open-ended response |
| 2 | The Human Factor | In your experience, what is the most human part of the language assessment process that a computer can never replace? | Open-ended response |
| 3 | Innovation Impact | List one advantage and one disadvantage of using ChatGPT or AI in English assessment. | Advantage: ____________________ Disadvantage: ____________________ |
| 4 | Equity and Access | Do you believe that current assessment standards in your university provide an equal chance of success for all students, regardless of their background or digital skills? Please explain. | Open-ended response |
| 5 | The Future of Assessment | If assessment in Egypt and Saudi Arabia becomes fully automated by AI in the next ten years, what do you think will happen to the moral development of learners? | Open-ended response |

**Summary of Instrument Mapping**

| **Instrument** | **Key Framework Applied** | **Core Research Area** |
| --- | --- | --- |
| Interviews | Ethical Assessment Framework | Standards, policy, teacher agency, and institutional accountability |
| Focus groups | Sociocultural Theory (ZPD) | Learner well-being, AI-mediated identity, self-efficacy, and assessment-related burnout |
| Open-ended questionnaire | Freirean Critical Pedagogy | Fairness, public trust, equity, moral growth, and humanistic accountability |

**Note.** The instruments were adapted linguistically for Arabic-speaking participants while preserving the conceptual focus of each item.
